# Supplementary material
Source: PubMed Central journal article supplement (PMC5587062)
Supplement: jc.2017-00849.sd1.pdf [file jc.2017-00849.sd1.pdf]

1 **Preeclampsia down-regulates microRNAs in fetal endothelial**  
2 **cells: Roles of miR-29a/c-3p in endothelial function**

3 Chi Zhou<sup>1</sup>, Qing-yun Zou<sup>1</sup>, Hua Li<sup>1,2</sup>, Rui-fang Wang<sup>1,3</sup>, Ai-xia Liu<sup>1,4</sup>, Ronald R. Magness<sup>1,§</sup>, and  
4 Jing Zheng<sup>1,5,\*</sup>

5  
6 <sup>1</sup>Department of Obstetrics and Gynecology, University of Wisconsin-Madison, Madison, WI,  
7 United States; <sup>2</sup>Department of Rheumatology and Immunology, the Affiliated Hospital of Qingdao  
8 University, Qingdao, Shandong, China; <sup>3</sup>302 Military Hospital of China, Beijing, China;  
9 <sup>4</sup>Department of Reproductive Endocrinology, Zhejiang University, Hangzhou, Zhejiang, China;  
10 <sup>5</sup>Cardiovascular Medicine Center, Affiliated Hospital of Guangdong Medical University, Zhanjiang,  
11 Guangdong, China; <sup>§</sup>Current address: Department of Obstetrics and Gynecology, Perinatal  
12 Research Center, University of South Florida, Tampa, FL, United States.

13  
14 **Short title:** PE down-regulates fetal endothelial microRNAs

15  
16 **\*Correspondence:** Jing Zheng, Ph.D., Department of Obstetrics and Gynecology, University of  
17 Wisconsin-Madison, PAB1 Meriter Hospital, 202 S. Park St., Madison, WI 53715, USA

18 Phone : (608) 417-6314. Fax : (608) 257-1304. E-mail: jzheng@wisc.edu

19

## Supplemental Detailed Methods

### 20 Isolation and characterization of HUVECs

21 HUVECs were freshly isolated from umbilical veins immediately after cesarean-section  
22 delivery from NT and PE pregnancies using an enzymatic method as described (1-3). To avoid  
23 the potential impact caused by the long term *in vitro* culture, cells were purified using Dynabeads®  
24 CD31 Endothelial Cell (Life Technologies, Carlsbad, CA) after 16 hr of culture under 37 °C and  
25 5% CO<sub>2</sub> in Endothelial Cell Medium (ECM; ScienCell Research Laboratories, Carlsbad, CA),  
26 which consisted of ECM basal medium (ECM-b) supplemented with 5% fetal bovine serum, 1%  
27 endothelial cell growth supplement, and 1% penicillin/streptomycin solution.

### 28 Dil-Ac-LDL uptake assay

29 The purity of HUVECs was examined as previously described (1, 2). Cells were incubated  
30 with Acetylated Low Density Lipoprotein labeled with 1,1'-dioctadecyl-3,3,3',3'-tetramethyl-  
31 indocarbocyanine perchlorate (Dil-Ac-LDL, 10µg/mL, Biomedical Technologies, Stoughton, MA)  
32 for 4 hr at 37°C, fixed in 4% formaldehyde, and examined under a phase-contrast and fluorescent  
33 microscope. Images were taken under a Nikon TE2000U inverted microscope connected to a  
34 Spot Insight QE CCD camera using the SPOT advanced image analysis software. Cells exhibiting  
35 uptake of LDL were counted. Cells incubated without Dil-Ac-LDL were served as negative  
36 controls.

### 37 Human miRNome PCR array analysis

38 Screening of differentially expressed miRNAs between P0 HUVECs isolated from NT and  
39 PE pregnancies was performed using the miScript human miRNome PCR Array (Qiagen), which  
40 contained a total of 1008 mature miRNAs Total RNA samples were reverse transcribed into  
41 cDNAs using a miScript II RT Kit (Qiagen). A total of 750 ng total RNA sample was used in each  
42 reverse transcription reaction. Diluted cDNA corresponding with 0.6 ng of original total RNA was

43 utilized as the template in each RT-qPCR reaction of miScript human miRNome PCR Array. The  
44 miRNAs expression data were normalized to the external control (miRTC, Qiagen) along with five  
45 internal control miRNAs (SNORD61, SNORD68, SNORD72, SNORD95, and SNORD96A) and  
46 further analyzed using the miScript miRNA PCR Array Data Analysis Tools (Qiagen) to determine  
47 the DE-miRNAs between NT and PE groups. Three individual cell preparations were analyzed for  
48 each group.

### 49 **Real-time qPCR (RT-qPCR) analysis**

50 For parallel analysis of miRNAs of interest, 400ng small RNA fragment enriched total RNA  
51 isolated from each sample was reverse transcribed into cDNA using a miScript II RT Kit (Qiagen,  
52 CA). Diluted cDNA corresponding to 1 ng of original total RNA was utilized as the template in  
53 each RT-qPCR reaction. Each miRNA of interest was performed using commercially available  
54 miRNA miScript Primer Assays in Supplemental Table S1 (Qiagen), miScript SYBR Green PCR  
55 Kit (Qiagen), and StepOne<sup>Plus</sup> qPCR system (Life Technologies). The RT-qPCR data were  
56 normalized to the external control (miRTC, Qiagen) along with internal control miRNAs  
57 (SNORD68, SNORD95, and SNORD96A) using the Biogazelle qBase<sup>Plus</sup> (ver. 2.0) software (4).  
58 The normalized RT-qPCR data were then further analyzed using the  $2^{-\Delta\Delta CT}$  method (4-6) to  
59 determine the relative abundance. Efficiency of all target and control miRNA assays were  
60 between 90% and 110%. Six individual cell preparations were analyzed for each group. Three  
61 technical repeats were performed for each target genes per sample.

### 62 **Knockdown of miRNAs**

63 Due to the limited amount of P0 HUVECs (usually only  $3 \times 10^5$ - $1 \times 10^6$  per preparation), we  
64 used passages 3-4 (P3-4) HUVECs preparations pooled from 5 NT individuals as described(1, 2)  
65 in the miRNA knockdown study. Knockdown of each target miRNA was performed using miScript  
66 miRNA Inhibitor (Qiagen, refer as miRNA-(i)) which is chemically synthesized and modified single-  
67 strand RNA that specifically bind and inhibit target miRNA (7, 8).

68 P3-4 HUVECs at 40-50% confluence were transfected with miScript miRNA Inhibitors  
69 (Qiagen) that specifically target human miR-29a-3p (Cat.# MIN0000086), miR-29c-3p (Cat.#  
70 MIN0000681), and miScript Inhibitor Negative Control (Cat.# 1027272) at 0, 50, or 100 nM using  
71 the HiPerFect Transfection Reagent (Qiagen) for 6, 24, 48, and 72 hr (7). Cells transfected with  
72 the miScript Inhibitor Negative Control were used as negative controls (NC). Cells treated with  
73 only the HiPerFect Transfection Reagent were used as the vehicle controls (9). RT-qPCR (see  
74 above) was used to verify the efficiency of miRNA knockdown.

75 The dose and time of all VEGFA and FGF2 treatments are determined based on  
76 previous reports from our own lab (1, 3, 10) and others (8, 11-13).

### 77 **Western blotting analysis**

78 Western blot analysis was performed as described (3, 10, 14, 15). In brief, cells were lysed in  
79 lysis buffer [50 mM HEPES, 0.1 M NaCl, 10 mM EDTA, 4 mM sodium pyrophosphate, 10 mM  
80 sodium fluoride, 2 mM sodium orthovanadate (pH 7.5), 1 mM phenyl methyl sulfonyl fluoride, 1%  
81 Triton X-100, 5 µg/ml leupeptin, 5 µg/ml aprotinin] followed by sonication. The lysates were  
82 centrifuged at 13,000 g for 10 min. Protein concentrations of the supernatants were determined  
83 with bovine serum albumin (BSA; fraction V; Sigma) as standards. The protein samples (20 µg)  
84 were separated on SDS-PAGE gels and electrically transferred to polyvinylidene difluoride  
85 membranes. The membranes were immunoblotted with the antibody against each different target  
86 (Supplemental Table S2). Proteins were visualized using enhanced chemiluminescence reagents  
87 (Thermo Fisher Scientifics, MA) followed by exposure to chemiluminescence films. The  
88 immunoreactive signals of the bands on the films were recorded using densitometry and analyzed  
89 by Image J software. Total (T)-AKT1 and T-ERK1/2 levels were normalized to GAPDH.  
90 Phosphorylated (P)-AKT1 and P-ERK1/2 levels were first normalized to GAPDH and then  
91 proportioned to corresponding normalized T-AKT1 and T-ERK1/2, respectively.

### 92 **Scratch healing assay**

93 Cell migration was assessed by scratch healing assay as described (11, 12). HUVECs  
94 seeded in 24-well plates were treated with Vehicle, NC, and miRNA-(i) and cultured for 24-30h to  
95 allow cells reach confluence. The confluent cell monolayer was wounded by manually scraping  
96 the cells with a 200ul pipette tip. The cells were immediately treated with ECM-b (as control),  
97 VEGFA (10 ng/ml), and FGF2 (10 ng/ml). Cell migration into the wound area was monitored after  
98 0 and 20h of treatments. For each scratch, five images were photographed under a 4X objective  
99 lens, which represent 80% of the length of the scratch. Images were photographed immediately  
100 after scratching (0 hr) and after 20 hr of ECM-b, VEGFA and FGF2 treatment. Sizes of the wound  
101 area (mm<sup>2</sup>) were calculated using the Image J image analysis software.

## 102 **Cell proliferation assay**

103 Cell proliferation was assessed by methyl thiazolyl tetrazolium (MTT) assay using the MTT  
104 Assay Kit (Cayman Chemical, Ann Arbor, MI) as described (16). After treating with Vehicle, NC,  
105 and miRNA-(i) for 24 hr, cells seeded in 96-well plates (5000 cells/well) were serum-starved in  
106 ECM-b for 8 hr, and treated with ECM-b (as control), ECM, VEGFA (10 and 100 ng/ml), or FGF2  
107 (10 and 100ng/ml) for 42 hr. Cells were then incubated with MTT, and absorbance at 580nm was  
108 measured using a Synergy HT Multi-Detection Microplate Reader (Bio-Tek Instruments,  
109 Winooski, VT).

## 110 **Cell monolayer integrity assay**

111 Cell monolayer integrity of HUVECs was determined using the ECIS Z $\theta$ + 96-well array station  
112 (Applied BioPhysics, Troy, NY) using 96-well plates (96W10E+) (8, 13). Cells seeded at  $2 \times 10^4$   
113 per well were treated with Vehicle, NC, and miRNA-(i) and cultured for 30h to allow cells reach  
114 confluence. The confluent cells were treated with ECM-b (as control), ECM, VEGFA (100 ng/ml),  
115 or FGF2 (100 ng/ml) (4 wells per treatment). ECIS was used to real-time measure the electrical  
116 resistance over the monolayer of endothelial cells (indicating of the monolayer integrity). Electrical  
117 resistance was constantly monitored and recorded up to 25 hr after treatment.

118 **References:**

- 119 1. Jiang YZ, Wang K, Li Y, Dai CF, Wang P, Kendzioriski C, Chen DB, Zheng J 2013  
120 Transcriptional and functional adaptations of human endothelial cells to physiological  
121 chronic low oxygen. *Biol Reprod* 88(5):114
- 122 2. Jiang YZ, Wang K, Li Y, Dai CF, Wang P, Kendzioriski C, Chen DB, Zheng J 2013  
123 Enhanced cellular responses and distinct gene profiles in human fetoplacental artery  
124 endothelial cells under chronic low oxygen. *Biol Reprod* 89(6):133
- 125 3. Jiang YZ, Li Y, Wang K, Dai CF, Huang SA, Chen DB, Zheng J 2014 Distinct roles of  
126 HIF1A in endothelial adaptations to physiological and ambient oxygen. *Mol Cell*  
127 *Endocrinol* 391(1-2):60-67
- 128 4. Hellemans J, Mortier G, De Paepe A, Speleman F, Vandesompele J 2007 qBase relative  
129 quantification framework and software for management and automated analysis of real-  
130 time quantitative PCR data. *Genome Biol* 8(2):R19
- 131 5. Yuan JS, Reed A, Chen F, Stewart CN, Jr 2006 Statistical analysis of real-time PCR data.  
132 *BMC Bioinformatics* 7:85
- 133 6. Zhou C, Dobrinsky J, Tsoi S, Foxcroft GR, Dixon WT, Stothard P, Verstegen J, Dyck MK  
134 2014 Characterization of the altered gene expression profile in early porcine embryos  
135 generated from parthenogenesis and somatic cell chromatin transfer. *PLoS One*  
136 9(3):e91728
- 137 7. Thomson DW, Bracken CP, Szubert JM, Goodall GJ 2013 On measuring miRNAs after  
138 transient transfection of mimics or antisense inhibitors. *PLoS One* 8(1):e55214
- 139 8. Dong F, Zhou X, Li C, Yan S, Deng X, Cao Z, Li L, Tang B, Allen TD, Liu J 2014  
140 Dihydroartemisinin targets VEGFR2 via the NF-kappaB pathway in endothelial cells to  
141 inhibit angiogenesis. *Cancer Biol Ther* 15(11):1479-1488

- 142 9. Ukai T, Sato M, Akutsu H, Umezawa A, Mochida J 2012 MicroRNA-199a-3p, microRNA-  
143 193b, and microRNA-320c are correlated to aging and regulate human cartilage  
144 metabolism. *J Orthop Res* 30(12):1915-1922
- 145 10. Wang K, Jiang YZ, Chen DB, Zheng J 2009 Hypoxia enhances FGF2- and VEGF-  
146 stimulated human placental artery endothelial cell proliferation: Roles of MEK1/2/ERK1/2  
147 and PI3K/AKT1 pathways. *Placenta* 30(12):1045-1051
- 148 11. Dai CF, Jiang YZ, Li Y, Wang K, Liu PS, Patankar MS, Zheng J 2011 Expression and  
149 roles of Slit/Robo in human ovarian cancer. *Histochem Cell Biol* 135(5):475-485
- 150 12. Liao WX, Feng L, Zheng J, Chen DB 2010 Deciphering mechanisms controlling  
151 placental artery endothelial cell migration stimulated by vascular endothelial growth  
152 factor. *Endocrinology* 151(7):3432-3444
- 153 13. Chen J, Wang J, Su C, Qian W, Sun L, Sun H, Chen J, Zhang H, Zhang J 2016 Urinary  
154 trypsin inhibitor attenuates LPS-induced endothelial barrier dysfunction by upregulation  
155 of vascular endothelial-cadherin expression. *Inflamm Res* 65(3):213-224
- 156 14. Chung JY, Song Y, Wang Y, Magness RR, Zheng J 2004 Differential expression of  
157 vascular endothelial growth factor (VEGF), endocrine gland derived-VEGF, and VEGF  
158 receptors in human placentas from normal and preeclamptic pregnancies. *J Clin*  
159 *Endocrinol Metab* 89(5):2484-2490
- 160 15. Jiang YZ, Wang K, Fang R, Zheng J 2010 Expression of aryl hydrocarbon receptor in  
161 human placentas and fetal tissues. *J Histochem Cytochem* 58(8):679-685
- 162 16. Li Y, Wang K, Zou QY, Magness RR, Zheng J 2015 2,3,7,8-tetrachlorodibenzo-p-dioxin  
163 differentially suppresses angiogenic responses in human placental vein and artery  
164 endothelial cells. *Toxicology* 336:70-78

**Supplemental Table S1. List of miRNA Primer Assays used in miRNA RT-qPCR.**

|    | <b>Mature miRNA ID</b> | <b>RT-qPCR Primer Assay type</b>   | <b>Vendor</b> | <b>Catalog Number</b> |
|----|------------------------|------------------------------------|---------------|-----------------------|
| 1  | hsa-miR-101-5p         | Primer Assay for miRNA of interest | Qiagen        | MS00008379            |
| 2  | hsa-miR-1293           | Primer Assay for miRNA of interest | Qiagen        | MS00014539            |
| 3  | hsa-miR-146a-5p        | Primer Assay for miRNA of interest | Qiagen        | MS00003535            |
| 4  | hsa-miR-1537-3p        | Primer Assay for miRNA of interest | Qiagen        | MS00016471            |
| 5  | hsa-miR-192-5p         | Primer Assay for miRNA of interest | Qiagen        | MS00003689            |
| 6  | hsa-miR-2116-5p        | Primer Assay for miRNA of interest | Qiagen        | MS00031598            |
| 7  | hsa-miR-219a-1-3p      | Primer Assay for miRNA of interest | Qiagen        | MS00009128            |
| 8  | hsa-miR-29a-3p         | Primer Assay for miRNA of interest | Qiagen        | MS00003262            |
| 9  | hsa-miR-29b-3p         | Primer Assay for miRNA of interest | Qiagen        | MS00006566            |
| 10 | hsa-miR-29c-3p         | Primer Assay for miRNA of interest | Qiagen        | MS00003269            |
| 11 | hsa-miR-3186-5p        | Primer Assay for miRNA of interest | Qiagen        | MS00020944            |
| 12 | hsa-miR-32-5p          | Primer Assay for miRNA of interest | Qiagen        | MS00003297            |
| 13 | hsa-miR-337-3p         | Primer Assay for miRNA of interest | Qiagen        | MS00023457            |
| 14 | hsa-miR-3691-5p        | Primer Assay for miRNA of interest | Qiagen        | MS00007651            |
| 15 | hsa-miR-369-5p         | Primer Assay for miRNA of interest | Qiagen        | MS00006860            |
| 16 | hsa-miR-374c-5p        | Primer Assay for miRNA of interest | Qiagen        | MS00023492            |
| 17 | hsa-miR-3924           | Primer Assay for miRNA of interest | Qiagen        | MS00031843            |
| 18 | hsa-miR-4288           | Primer Assay for miRNA of interest | Qiagen        | MS00021385            |
| 19 | hsa-miR-4317           | Primer Assay for miRNA of interest | Qiagen        | MS00021588            |
| 20 | hsa-miR-551b-3p        | Primer Assay for miRNA of interest | Qiagen        | MS00004627            |
| 21 | hsa-miR-598-3p         | Primer Assay for miRNA of interest | Qiagen        | MS00010290            |



|    |                |                                                              |        |            |
|----|----------------|--------------------------------------------------------------|--------|------------|
| 22 | hsa-miR-617    | Primer Assay for miRNA of interest                           | Qiagen | MS00005082 |
| 23 | hsa-miR-744-3p | Primer Assay for miRNA of interest                           | Qiagen | MS00010556 |
| 24 | MIRTC          | Primer Assay for external control                            | Qiagen | MS00000001 |
| 25 | Hs_SNORD68     | Primer Assay for endogenous control<br>(small nucleolar RNA) | Qiagen | MS00033712 |
| 26 | Hs_SNORD68     | Primer Assay for endogenous control<br>(small nucleolar RNA) | Qiagen | MS00033719 |
| 27 | Hs_SNORD68     | Primer Assay for endogenous control<br>(small nucleolar RNA) | Qiagen | MS00033726 |
| 28 | Hs_SNORD68     | Primer Assay for endogenous control<br>(small nucleolar RNA) | Qiagen | MS00033733 |

---

**Supplemental Table S2. List of antibodies used for Western-blot analyses.**

|   | <b>Antibody</b>          | <b>Vendor</b>             | <b>Catalog Number</b> |
|---|--------------------------|---------------------------|-----------------------|
| 1 | T-AKT1                   | Cell Signaling Technology | 9272                  |
| 2 | T-ERK1/2                 | Cell Signaling Technology | 9102                  |
| 3 | P-ERK1/2 (Thr202/Tyr204) | Cell Signaling Technology | 9101                  |
| 4 | P-AKT (Ser473)           | Cell Signaling Technology | 9271                  |
| 5 | GAPDH                    | Abnova                    | H00002597-M01         |

**Supplemental Table S3. Positively detected miRNAs in P0-HUVECs and DE-miRNAs between PE and NT P0-HUVECs.**

| <b>miRNAs positively detected in P0-HUVECs*</b> | <b>DE-miRNAs<sup>†</sup> in PE vs. NT P0-HUVECs</b> |
|-------------------------------------------------|-----------------------------------------------------|
| hsa-miR-101-5p                                  | hsa-miR-101-5p                                      |
| hsa-miR-1293                                    | hsa-miR-1293                                        |
| hsa-miR-146a-5p                                 | hsa-miR-146a-5p                                     |
| hsa-miR-1537-3p                                 | hsa-miR-1537-3p                                     |
| hsa-miR-192-5p                                  | hsa-miR-192-5p                                      |
| hsa-miR-2116-5p                                 | hsa-miR-2116-5p                                     |
| hsa-miR-219a-1-3p                               | hsa-miR-219a-1-3p                                   |
| hsa-miR-29a-3p                                  | hsa-miR-29a-3p                                      |
| hsa-miR-29b-3p                                  | hsa-miR-29b-3p                                      |
| hsa-miR-29c-3p                                  | hsa-miR-29c-3p                                      |
| hsa-miR-3186-5p                                 | hsa-miR-3186-5p                                     |
| hsa-miR-32-5p                                   | hsa-miR-32-5p                                       |
| hsa-miR-337-3p                                  | hsa-miR-337-3p                                      |
| hsa-miR-3691-5p                                 | hsa-miR-3691-5p                                     |
| hsa-miR-369-5p                                  | hsa-miR-369-5p                                      |
| hsa-miR-374c-5p                                 | hsa-miR-374c-5p                                     |
| hsa-miR-3924                                    | hsa-miR-3924                                        |
| hsa-miR-4288                                    | hsa-miR-4288                                        |
| hsa-miR-4317                                    | hsa-miR-4317                                        |
| hsa-miR-551b-3p                                 | hsa-miR-551b-3p                                     |
| hsa-miR-598-3p                                  | hsa-miR-598-3p                                      |
| hsa-miR-617                                     | hsa-miR-617                                         |
| hsa-miR-744-3p                                  | hsa-miR-744-3p                                      |
| hsa-miR-100-3p                                  |                                                     |
| hsa-miR-100-5p                                  |                                                     |
| hsa-miR-101-3p                                  |                                                     |
| hsa-miR-103a-2-5p                               |                                                     |
| hsa-miR-103a-3p                                 |                                                     |
| hsa-miR-103b                                    |                                                     |
| hsa-miR-105-3p                                  |                                                     |
| hsa-miR-105-5p                                  |                                                     |
| hsa-miR-106a-3p                                 |                                                     |
| hsa-miR-106b-3p                                 |                                                     |
| hsa-miR-106b-5p                                 |                                                     |
| hsa-miR-107                                     |                                                     |
| hsa-miR-10a-3p                                  |                                                     |
| hsa-miR-10a-5p                                  |                                                     |
| hsa-miR-10b-3p                                  |                                                     |
| hsa-miR-10b-5p                                  |                                                     |
| hsa-miR-1178-3p                                 |                                                     |
| hsa-miR-1179                                    |                                                     |
| hsa-miR-1180-3p                                 |                                                     |

hsa-miR-1182  
hsa-miR-1183  
hsa-miR-1184  
hsa-miR-1185-5p  
hsa-miR-1193  
hsa-miR-1197  
hsa-miR-1203  
hsa-miR-1204  
hsa-miR-1205  
hsa-miR-1207-3p  
hsa-miR-1207-5p  
hsa-miR-1208  
hsa-miR-1224-5p  
hsa-miR-122-5p  
hsa-miR-1226-3p  
hsa-miR-1227-3p  
hsa-miR-1228-5p  
hsa-miR-1231  
hsa-miR-1233-3p  
hsa-miR-1237-3p  
hsa-miR-1238-3p  
hsa-miR-1243  
hsa-miR-124-3p  
hsa-miR-1244  
hsa-miR-1247-5p  
hsa-miR-1248  
hsa-miR-1250-5p  
hsa-miR-1253  
hsa-miR-1255b-5p  
hsa-miR-1256  
hsa-miR-1257  
hsa-miR-1258  
hsa-miR-125a-3p  
hsa-miR-125a-5p  
hsa-miR-125b-1-3p  
hsa-miR-125b-2-3p  
hsa-miR-125b-5p  
hsa-miR-1260a  
hsa-miR-1260b  
hsa-miR-1261  
hsa-miR-1262  
hsa-miR-1263  
hsa-miR-126-3p  
hsa-miR-1265  
hsa-miR-126-5p  
hsa-miR-1266-5p  
hsa-miR-1267

hsa-miR-1269a  
hsa-miR-1270  
hsa-miR-1271-5p  
hsa-miR-1272  
hsa-miR-1273a  
hsa-miR-1273d  
hsa-miR-127-3p  
hsa-miR-127-5p  
hsa-miR-1276  
hsa-miR-1278  
hsa-miR-1279  
hsa-miR-1280  
hsa-miR-1283  
hsa-miR-128-3p  
hsa-miR-1284  
hsa-miR-1285-3p  
hsa-miR-1286  
hsa-miR-1287-5p  
hsa-miR-1288-3p  
hsa-miR-1289  
hsa-miR-1291  
hsa-miR-129-1-3p  
hsa-miR-129-2-3p  
hsa-miR-1294  
hsa-miR-1295a  
hsa-miR-129-5p  
hsa-miR-1296-5p  
hsa-miR-1297  
hsa-miR-1298-5p  
hsa-miR-1299  
hsa-miR-1301-3p  
hsa-miR-1302  
hsa-miR-1303  
hsa-miR-1304-5p  
hsa-miR-1305  
hsa-miR-1306-3p  
hsa-miR-1307-3p  
hsa-miR-130a-3p  
hsa-miR-130a-5p  
hsa-miR-130b-3p  
hsa-miR-130b-5p  
hsa-miR-1321  
hsa-miR-1322  
hsa-miR-1323  
hsa-miR-132-3p  
hsa-miR-132-5p  
hsa-miR-133a-3p

hsa-miR-133b  
hsa-miR-134-5p  
hsa-miR-135a-5p  
hsa-miR-135b-3p  
hsa-miR-135b-5p  
hsa-miR-136-3p  
hsa-miR-137  
hsa-miR-138-1-3p  
hsa-miR-138-2-3p  
hsa-miR-138-5p  
hsa-miR-139-3p  
hsa-miR-139-5p  
hsa-miR-1-3p  
hsa-miR-140-3p  
hsa-miR-140-5p  
hsa-miR-141-3p  
hsa-miR-141-5p  
hsa-miR-142-3p  
hsa-miR-142-5p  
hsa-miR-143-3p  
hsa-miR-143-5p  
hsa-miR-144-3p  
hsa-miR-144-5p  
hsa-miR-145-3p  
hsa-miR-145-5p  
hsa-miR-1468-5p  
hsa-miR-146a-3p  
hsa-miR-146b-3p  
hsa-miR-146b-5p  
hsa-miR-1471  
hsa-miR-147a  
hsa-miR-147b  
hsa-miR-148a-3p  
hsa-miR-148a-5p  
hsa-miR-148b-3p  
hsa-miR-148b-5p  
hsa-miR-149-5p  
hsa-miR-150-5p  
hsa-miR-151a-3p  
hsa-miR-151a-5p  
hsa-miR-152-3p  
hsa-miR-153-3p  
hsa-miR-1538  
hsa-miR-1539  
hsa-miR-154-3p  
hsa-miR-154-5p  
hsa-miR-155-3p

hsa-miR-155-5p  
hsa-miR-15a-3p  
hsa-miR-15a-5p  
hsa-miR-15b-3p  
hsa-miR-15b-5p  
hsa-miR-16-1-3p  
hsa-miR-16-2-3p  
hsa-miR-16-5p  
hsa-miR-17-3p  
hsa-miR-17-5p  
hsa-miR-181a-2-3p  
hsa-miR-181a-3p  
hsa-miR-181a-5p  
hsa-miR-181b-5p  
hsa-miR-181c-3p  
hsa-miR-181c-5p  
hsa-miR-181d-5p  
hsa-miR-182-3p  
hsa-miR-182-5p  
hsa-miR-1827  
hsa-miR-183-3p  
hsa-miR-183-5p  
hsa-miR-184  
hsa-miR-185-3p  
hsa-miR-185-5p  
hsa-miR-186-5p  
hsa-miR-187-3p  
hsa-miR-187-5p  
hsa-miR-188-3p  
hsa-miR-188-5p  
hsa-miR-18a-3p  
hsa-miR-18a-5p  
hsa-miR-18b-3p  
hsa-miR-18b-5p  
hsa-miR-1908-5p  
hsa-miR-1909-5p  
hsa-miR-190a-5p  
hsa-miR-190b  
hsa-miR-1910-5p  
hsa-miR-1911-3p  
hsa-miR-1911-5p  
hsa-miR-1912  
hsa-miR-191-3p  
hsa-miR-1914-3p  
hsa-miR-1914-5p  
hsa-miR-191-5p  
hsa-miR-192-3p

hsa-miR-193a-3p  
hsa-miR-193a-5p  
hsa-miR-193b-3p  
hsa-miR-193b-5p  
hsa-miR-194-3p  
hsa-miR-194-5p  
hsa-miR-195-3p  
hsa-miR-195-5p  
hsa-miR-196a-3p  
hsa-miR-196a-5p  
hsa-miR-196b-3p  
hsa-miR-196b-5p  
hsa-miR-197-3p  
hsa-miR-1976  
hsa-miR-199a-5p  
hsa-miR-199b-5p  
hsa-miR-19a-3p  
hsa-miR-19a-5p  
hsa-miR-19b-1-5p  
hsa-miR-19b-2-5p  
hsa-miR-19b-3p  
hsa-miR-200a-3p  
hsa-miR-200a-5p  
hsa-miR-200b-3p  
hsa-miR-200b-5p  
hsa-miR-200c-3p  
hsa-miR-200c-5p  
hsa-miR-202-3p  
hsa-miR-202-5p  
hsa-miR-203a-3p  
hsa-miR-204-5p  
hsa-miR-205-3p  
hsa-miR-205-5p  
hsa-miR-206  
hsa-miR-20a-3p  
hsa-miR-20a-5p  
hsa-miR-20b-3p  
hsa-miR-20b-5p  
hsa-miR-210-3p  
hsa-miR-2110  
hsa-miR-2113  
hsa-miR-2114-3p  
hsa-miR-2114-5p  
hsa-miR-2115-3p  
hsa-miR-2115-5p  
hsa-miR-211-5p  
hsa-miR-2116-3p



hsa-miR-2117  
hsa-miR-212-3p  
hsa-miR-21-3p  
hsa-miR-214-3p  
hsa-miR-214-5p  
hsa-miR-215-5p  
hsa-miR-21-5p  
hsa-miR-216a-5p  
hsa-miR-216b-5p  
hsa-miR-217  
hsa-miR-218-1-3p  
hsa-miR-218-2-3p  
hsa-miR-218-5p  
hsa-miR-219a-2-3p  
hsa-miR-219a-5p  
hsa-miR-221-3p  
hsa-miR-221-5p  
hsa-miR-222-3p  
hsa-miR-222-5p  
hsa-miR-223-3p  
hsa-miR-223-5p  
hsa-miR-22-3p  
hsa-miR-224-3p  
hsa-miR-224-5p  
hsa-miR-22-5p  
hsa-miR-2276-3p  
hsa-miR-2278  
hsa-miR-2355-3p  
hsa-miR-2355-5p  
hsa-miR-23a-3p  
hsa-miR-23a-5p  
hsa-miR-23b-3p  
hsa-miR-23b-5p  
hsa-miR-23c  
hsa-miR-24-1-5p  
hsa-miR-24-2-5p  
hsa-miR-24-3p  
hsa-miR-25-3p  
hsa-miR-25-5p  
hsa-miR-26a-1-3p  
hsa-miR-26a-2-3p  
hsa-miR-26a-5p  
hsa-miR-26b-3p  
hsa-miR-26b-5p  
hsa-miR-27a-3p  
hsa-miR-27a-5p  
hsa-miR-27b-3p

hsa-miR-27b-5p  
hsa-miR-28-3p  
hsa-miR-28-5p  
hsa-miR-2909  
hsa-miR-296-3p  
hsa-miR-297  
hsa-miR-298  
hsa-miR-299-3p  
hsa-miR-299-5p  
hsa-miR-29a-5p  
hsa-miR-29b-1-5p  
hsa-miR-29b-2-5p  
hsa-miR-29c-5p  
hsa-miR-301a-3p  
hsa-miR-301b-3p  
hsa-miR-302a-3p  
hsa-miR-302a-5p  
hsa-miR-302b-5p  
hsa-miR-302d-3p  
hsa-miR-302d-5p  
hsa-miR-302e  
hsa-miR-302f  
hsa-miR-3065-3p  
hsa-miR-3065-5p  
hsa-miR-3074-3p  
hsa-miR-30a-3p  
hsa-miR-30a-5p  
hsa-miR-30b-3p  
hsa-miR-30b-5p  
hsa-miR-30c-1-3p  
hsa-miR-30c-2-3p  
hsa-miR-30c-5p  
hsa-miR-30d-3p  
hsa-miR-30d-5p  
hsa-miR-30e-3p  
hsa-miR-30e-5p  
hsa-miR-3115  
hsa-miR-3116  
hsa-miR-3117-3p  
hsa-miR-3118  
hsa-miR-3119  
hsa-miR-3120-3p  
hsa-miR-3121-3p  
hsa-miR-3122  
hsa-miR-3124-5p  
hsa-miR-3125  
hsa-miR-3126-3p

hsa-miR-3126-5p  
hsa-miR-3127-5p  
hsa-miR-3129-5p  
hsa-miR-3130-3p  
hsa-miR-3130-5p  
hsa-miR-3131  
hsa-miR-3132  
hsa-miR-3134  
hsa-miR-3135a  
hsa-miR-3136-5p  
hsa-miR-3137  
hsa-miR-3138  
hsa-miR-3139  
hsa-miR-31-3p  
hsa-miR-3140-3p  
hsa-miR-3141  
hsa-miR-3143  
hsa-miR-3144-3p  
hsa-miR-3144-5p  
hsa-miR-3146  
hsa-miR-3147  
hsa-miR-3150a-3p  
hsa-miR-3150b-3p  
hsa-miR-3151-5p  
hsa-miR-3153  
hsa-miR-3154  
hsa-miR-3155b  
hsa-miR-3156-5p  
hsa-miR-3157-5p  
hsa-miR-3158-3p  
hsa-miR-3159  
hsa-miR-31-5p  
hsa-miR-3161  
hsa-miR-3162-5p  
hsa-miR-3163  
hsa-miR-3164  
hsa-miR-3165  
hsa-miR-3166  
hsa-miR-3167  
hsa-miR-3170  
hsa-miR-3173-3p  
hsa-miR-3174  
hsa-miR-3176  
hsa-miR-3177-3p  
hsa-miR-3180-3p  
hsa-miR-3182  
hsa-miR-3184-5p

hsa-miR-3185  
hsa-miR-3186-3p  
hsa-miR-3190-3p  
hsa-miR-3191-3p  
hsa-miR-3193  
hsa-miR-3194-5p  
hsa-miR-3199  
hsa-miR-3200-3p  
hsa-miR-3200-5p  
hsa-miR-3201  
hsa-miR-320a  
hsa-miR-320b  
hsa-miR-320d  
hsa-miR-320e  
hsa-miR-323a-5p  
hsa-miR-323b-3p  
hsa-miR-323b-5p  
hsa-miR-32-3p  
hsa-miR-324-3p  
hsa-miR-324-5p  
hsa-miR-326  
hsa-miR-329-3p  
hsa-miR-330-3p  
hsa-miR-330-5p  
hsa-miR-331-3p  
hsa-miR-331-5p  
hsa-miR-335-3p  
hsa-miR-335-5p  
hsa-miR-337-5p  
hsa-miR-338-3p  
hsa-miR-338-5p  
hsa-miR-339-3p  
hsa-miR-339-5p  
hsa-miR-33a-3p  
hsa-miR-33a-5p  
hsa-miR-33b-5p  
hsa-miR-340-3p  
hsa-miR-340-5p  
hsa-miR-342-3p  
hsa-miR-342-5p  
hsa-miR-345-5p  
hsa-miR-346  
hsa-miR-34a-3p  
hsa-miR-34a-5p  
hsa-miR-34b-3p  
hsa-miR-34b-5p  
hsa-miR-34c-3p

hsa-miR-3605-3p  
hsa-miR-3605-5p  
hsa-miR-3607-3p  
hsa-miR-3607-5p  
hsa-miR-3611  
hsa-miR-3612  
hsa-miR-361-3p  
hsa-miR-3614-3p  
hsa-miR-361-5p  
hsa-miR-3617-5p  
hsa-miR-3618  
hsa-miR-3622a-5p  
hsa-miR-3622b-3p  
hsa-miR-362-3p  
hsa-miR-362-5p  
hsa-miR-363-3p  
hsa-miR-363-5p  
hsa-miR-3647-5p  
hsa-miR-3650  
hsa-miR-3651  
hsa-miR-3652  
hsa-miR-3653-3p  
hsa-miR-3654  
hsa-miR-3655  
hsa-miR-3657  
hsa-miR-3658  
hsa-miR-3659  
hsa-miR-365b-3p  
hsa-miR-3660  
hsa-miR-3661  
hsa-miR-3666  
hsa-miR-3667-5p  
hsa-miR-3668  
hsa-miR-3669  
hsa-miR-3670  
hsa-miR-3671  
hsa-miR-3673  
hsa-miR-367-3p  
hsa-miR-3674  
hsa-miR-3675-3p  
hsa-miR-3675-5p  
hsa-miR-3678-3p  
hsa-miR-3678-5p  
hsa-miR-3679-5p  
hsa-miR-3680-5p  
hsa-miR-3681-3p  
hsa-miR-3681-5p

hsa-miR-3682-3p  
hsa-miR-3683  
hsa-miR-3684  
hsa-miR-3685  
hsa-miR-3687  
hsa-miR-3688-3p  
hsa-miR-3690  
hsa-miR-3692-3p  
hsa-miR-369-3p  
hsa-miR-370-3p  
hsa-miR-3714  
hsa-miR-371a-3p  
hsa-miR-372-3p  
hsa-miR-373-3p  
hsa-miR-374a-3p  
hsa-miR-374a-5p  
hsa-miR-374b-3p  
hsa-miR-375  
hsa-miR-376a-3p  
hsa-miR-376a-5p  
hsa-miR-376b-3p  
hsa-miR-376c-3p  
hsa-miR-377-3p  
hsa-miR-377-5p  
hsa-miR-378a-3p  
hsa-miR-378a-5p  
hsa-miR-378b  
hsa-miR-378c  
hsa-miR-379-3p  
hsa-miR-379-5p  
hsa-miR-380-3p  
hsa-miR-380-5p  
hsa-miR-381-3p  
hsa-miR-382-5p  
hsa-miR-383-5p  
hsa-miR-3907  
hsa-miR-3908  
hsa-miR-3909  
hsa-miR-3912-3p  
hsa-miR-3913-5p  
hsa-miR-3914  
hsa-miR-3916  
hsa-miR-3917  
hsa-miR-3918  
hsa-miR-3919  
hsa-miR-3920  
hsa-miR-3921

hsa-miR-3922-3p  
hsa-miR-3923  
hsa-miR-3925-5p  
hsa-miR-3926  
hsa-miR-3927-3p  
hsa-miR-3934-5p  
hsa-miR-3935  
hsa-miR-3938  
hsa-miR-3939  
hsa-miR-3941  
hsa-miR-3942-5p  
hsa-miR-3943  
hsa-miR-409-3p  
hsa-miR-409-5p  
hsa-miR-410-3p  
hsa-miR-411-3p  
hsa-miR-411-5p  
hsa-miR-412-3p  
hsa-miR-421  
hsa-miR-422a  
hsa-miR-423-3p  
hsa-miR-423-5p  
hsa-miR-424-3p  
hsa-miR-424-5p  
hsa-miR-4251  
hsa-miR-4252  
hsa-miR-4253  
hsa-miR-425-3p  
hsa-miR-4254  
hsa-miR-4255  
hsa-miR-425-5p  
hsa-miR-4257  
hsa-miR-4258  
hsa-miR-4260  
hsa-miR-4261  
hsa-miR-4262  
hsa-miR-4263  
hsa-miR-4264  
hsa-miR-4265  
hsa-miR-4267  
hsa-miR-4272  
hsa-miR-4273  
hsa-miR-4274  
hsa-miR-4275  
hsa-miR-4276  
hsa-miR-4277  
hsa-miR-4280

hsa-miR-4282  
hsa-miR-4283  
hsa-miR-4286  
hsa-miR-4289  
hsa-miR-429  
hsa-miR-4290  
hsa-miR-4291  
hsa-miR-4293  
hsa-miR-4294  
hsa-miR-4295  
hsa-miR-4296  
hsa-miR-4297  
hsa-miR-4298  
hsa-miR-4299  
hsa-miR-4300  
hsa-miR-4301  
hsa-miR-4302  
hsa-miR-4303  
hsa-miR-4304  
hsa-miR-4305  
hsa-miR-4306  
hsa-miR-4309  
hsa-miR-4310  
hsa-miR-4311  
hsa-miR-4312  
hsa-miR-431-3p  
hsa-miR-4314  
hsa-miR-4315  
hsa-miR-431-5p  
hsa-miR-4316  
hsa-miR-4318  
hsa-miR-4319  
hsa-miR-4323  
hsa-miR-432-3p  
hsa-miR-4324  
hsa-miR-4325  
hsa-miR-432-5p  
hsa-miR-4326  
hsa-miR-4328  
hsa-miR-4330  
hsa-miR-433-3p  
hsa-miR-448  
hsa-miR-449a  
hsa-miR-449b-3p  
hsa-miR-449b-5p  
hsa-miR-449c-3p  
hsa-miR-449c-5p



hsa-miR-450a-5p  
hsa-miR-450b-3p  
hsa-miR-451a  
hsa-miR-452-3p  
hsa-miR-452-5p  
hsa-miR-454-3p  
hsa-miR-454-5p  
hsa-miR-455-3p  
hsa-miR-455-5p  
hsa-miR-466  
hsa-miR-483-5p  
hsa-miR-484  
hsa-miR-485-5p  
hsa-miR-486-5p  
hsa-miR-487a-3p  
hsa-miR-487b-3p  
hsa-miR-488-3p  
hsa-miR-488-5p  
hsa-miR-489-3p  
hsa-miR-490-3p  
hsa-miR-490-5p  
hsa-miR-491-3p  
hsa-miR-491-5p  
hsa-miR-493-3p  
hsa-miR-493-5p  
hsa-miR-495-3p  
hsa-miR-496  
hsa-miR-497-3p  
hsa-miR-497-5p  
hsa-miR-499a-3p  
hsa-miR-499a-5p  
hsa-miR-500a-3p  
hsa-miR-500a-5p  
hsa-miR-501-3p  
hsa-miR-501-5p  
hsa-miR-502-3p  
hsa-miR-502-5p  
hsa-miR-504-5p  
hsa-miR-505-3p  
hsa-miR-505-5p  
hsa-miR-506-3p  
hsa-miR-507  
hsa-miR-508-3p  
hsa-miR-508-5p  
hsa-miR-509-3-5p  
hsa-miR-509-3p  
hsa-miR-509-5p

hsa-miR-510-5p  
hsa-miR-511-5p  
hsa-miR-512-3p  
hsa-miR-512-5p  
hsa-miR-513a-5p  
hsa-miR-513b-5p  
hsa-miR-513c-3p  
hsa-miR-513c-5p  
hsa-miR-514a-3p  
hsa-miR-514b-3p  
hsa-miR-514b-5p  
hsa-miR-515-3p  
hsa-miR-515-5p  
hsa-miR-517-5p  
hsa-miR-518a-3p  
hsa-miR-518b  
hsa-miR-518c-3p  
hsa-miR-518d-3p  
hsa-miR-518e-3p  
hsa-miR-518f-3p  
hsa-miR-519b-3p  
hsa-miR-519d-3p  
hsa-miR-519e-3p  
hsa-miR-519e-5p  
hsa-miR-520a-3p  
hsa-miR-520a-5p  
hsa-miR-520d-3p  
hsa-miR-520g-3p  
hsa-miR-522-3p  
hsa-miR-524-3p  
hsa-miR-524-5p  
hsa-miR-525-3p  
hsa-miR-525-5p  
hsa-miR-526b-3p  
hsa-miR-532-3p  
hsa-miR-532-5p  
hsa-miR-539-5p  
hsa-miR-541-3p  
hsa-miR-541-5p  
hsa-miR-542-3p  
hsa-miR-542-5p  
hsa-miR-543  
hsa-miR-544b  
hsa-miR-545-3p  
hsa-miR-545-5p  
hsa-miR-548a-5p  
hsa-miR-548b-3p

hsa-miR-548b-5p  
hsa-miR-548c-3p  
hsa-miR-548d-3p  
hsa-miR-548e-3p  
hsa-miR-548g-3p  
hsa-miR-548i  
hsa-miR-548j-5p  
hsa-miR-548k  
hsa-miR-548l  
hsa-miR-548n  
hsa-miR-548o-3p  
hsa-miR-548p  
hsa-miR-548q  
hsa-miR-548s  
hsa-miR-548t-3p  
hsa-miR-548t-5p  
hsa-miR-548v  
hsa-miR-549a  
hsa-miR-550a-3p  
hsa-miR-550a-5p  
hsa-miR-550b-3p  
hsa-miR-551a  
hsa-miR-551b-5p  
hsa-miR-552-3p  
hsa-miR-553  
hsa-miR-554  
hsa-miR-555  
hsa-miR-556-5p  
hsa-miR-559  
hsa-miR-561-3p  
hsa-miR-562  
hsa-miR-563  
hsa-miR-564  
hsa-miR-566  
hsa-miR-569  
hsa-miR-570-3p  
hsa-miR-571  
hsa-miR-575  
hsa-miR-576-3p  
hsa-miR-576-5p  
hsa-miR-577  
hsa-miR-578  
hsa-miR-579-3p  
hsa-miR-581  
hsa-miR-582-3p  
hsa-miR-582-5p  
hsa-miR-585-3p

hsa-miR-587  
hsa-miR-588  
hsa-miR-589-3p  
hsa-miR-589-5p  
hsa-miR-590-3p  
hsa-miR-590-5p  
hsa-miR-591  
hsa-miR-592  
hsa-miR-593-3p  
hsa-miR-593-5p  
hsa-miR-595  
hsa-miR-596  
hsa-miR-597-5p  
hsa-miR-600  
hsa-miR-601  
hsa-miR-604  
hsa-miR-605-5p  
hsa-miR-608  
hsa-miR-609  
hsa-miR-610  
hsa-miR-612  
hsa-miR-613  
hsa-miR-615-3p  
hsa-miR-615-5p  
hsa-miR-616-3p  
hsa-miR-616-5p  
hsa-miR-618  
hsa-miR-619-3p  
hsa-miR-620  
hsa-miR-621  
hsa-miR-622  
hsa-miR-623  
hsa-miR-624-5p  
hsa-miR-626  
hsa-miR-627-5p  
hsa-miR-628-3p  
hsa-miR-628-5p  
hsa-miR-629-3p  
hsa-miR-629-5p  
hsa-miR-630  
hsa-miR-631  
hsa-miR-632  
hsa-miR-633  
hsa-miR-634  
hsa-miR-635  
hsa-miR-637  
hsa-miR-639

hsa-miR-640  
hsa-miR-641  
hsa-miR-642b-3p  
hsa-miR-643  
hsa-miR-645  
hsa-miR-646  
hsa-miR-647  
hsa-miR-648  
hsa-miR-649  
hsa-miR-650  
hsa-miR-651-5p  
hsa-miR-652-3p  
hsa-miR-653-5p  
hsa-miR-654-3p  
hsa-miR-654-5p  
hsa-miR-655-3p  
hsa-miR-656-3p  
hsa-miR-658  
hsa-miR-659-3p  
hsa-miR-660-5p  
hsa-miR-661  
hsa-miR-662  
hsa-miR-664a-3p  
hsa-miR-664a-5p  
hsa-miR-668-3p  
hsa-miR-670-5p  
hsa-miR-675-3p  
hsa-miR-675-5p  
hsa-miR-676-3p  
hsa-miR-676-5p  
hsa-miR-708-5p  
hsa-miR-7-1-3p  
hsa-miR-720  
hsa-miR-7-2-3p  
hsa-miR-744-5p  
hsa-miR-758-3p  
hsa-miR-7-5p  
hsa-miR-761  
hsa-miR-765  
hsa-miR-766-3p  
hsa-miR-767-3p  
hsa-miR-767-5p  
hsa-miR-769-5p  
hsa-miR-770-5p  
hsa-miR-873-5p  
hsa-miR-874-3p  
hsa-miR-875-3p

hsa-miR-876-3p  
hsa-miR-876-5p  
hsa-miR-877-3p  
hsa-miR-877-5p  
hsa-miR-885-3p  
hsa-miR-885-5p  
hsa-miR-887-3p  
hsa-miR-888-3p  
hsa-miR-888-5p  
hsa-miR-889-3p  
hsa-miR-890  
hsa-miR-891a-5p  
hsa-miR-891b  
hsa-miR-892a  
hsa-miR-892b  
hsa-miR-920  
hsa-miR-921  
hsa-miR-924  
hsa-miR-92a-1-5p  
hsa-miR-92a-2-5p  
hsa-miR-92a-3p  
hsa-miR-92b-5p  
hsa-miR-93-3p  
hsa-miR-934  
hsa-miR-935  
hsa-miR-93-5p  
hsa-miR-936  
hsa-miR-937-3p  
hsa-miR-938  
hsa-miR-9-3p  
hsa-miR-941  
hsa-miR-942-5p  
hsa-miR-943  
hsa-miR-95-3p  
hsa-miR-9-5p  
hsa-miR-96-3p  
hsa-miR-96-5p  
hsa-miR-98-5p  
hsa-miR-99a-3p  
hsa-miR-99a-5p  
hsa-miR-99b-3p  
hsa-miR-99b-5p

---

\*Positively detected: Ct value <35 in the human miRNome PCR Array analysis between P0-HUVECs from PE and NT

†DE-miRNAs: miRNAs with fold change >|2| and P<0.05 in the human miRNome PCR Array analysis between PE and NT P0-HUVECs.

**Supplemental Table S4. PE-induced DE-miRNAs associated KEGG pathways.**

| KEGG pathway                                | Associated PE-induced DE-miRNAs                                                                                                                                                                  | # of Associated PE-induced DE-miRNAs in P0-HUVECs | FDR adjusted p-value |
|---------------------------------------------|--------------------------------------------------------------------------------------------------------------------------------------------------------------------------------------------------|---------------------------------------------------|----------------------|
| ECM-receptor interaction (hsa04512)         | hsa-miR-29a-3p<br>hsa-miR-29c-3p<br>hsa-miR-29b-3p<br>hsa-miR-146a-5p<br>hsa-miR-744-3p<br>hsa-miR-4288<br>hsa-miR-1293<br>hsa-miR-337-3p<br>hsa-miR-101-5p                                      | 9                                                 | 3.93E-45             |
| Lysine degradation (hsa00310)               | hsa-miR-29a-3p<br>hsa-miR-29c-3p<br>hsa-miR-29b-3p<br>hsa-miR-146a-5p<br>hsa-miR-337-3p<br>hsa-miR-551b-3p<br>hsa-miR-192-5p<br>hsa-miR-744-3p<br>hsa-miR-4288<br>hsa-miR-101-5p<br>hsa-miR-1293 | 11                                                | 2.63E-09             |
| Protein digestion and absorption (hsa04974) | hsa-miR-744-3p<br>hsa-miR-617<br>hsa-miR-4288<br>hsa-miR-29a-3p<br>hsa-miR-29c-3p<br>hsa-miR-29b-3p<br>hsa-miR-146a-5p<br>hsa-miR-1293<br>hsa-miR-337-3p<br>hsa-miR-219a-1-3p<br>hsa-miR-101-5p  | 11                                                | 1.10E-05             |
| Proteoglycans in cancer (hsa05205)          | hsa-miR-29a-3p<br>hsa-miR-29c-3p<br>hsa-miR-29b-3p<br>hsa-miR-337-3p<br>hsa-miR-146a-5p<br>hsa-miR-192-5p<br>hsa-miR-219a-1-3p                                                                   | 13                                                | 1.74E-05             |

|                                                                     |                                                                                                                                                                                                                                                                                                                    |    |          |
|---------------------------------------------------------------------|--------------------------------------------------------------------------------------------------------------------------------------------------------------------------------------------------------------------------------------------------------------------------------------------------------------------|----|----------|
|                                                                     | <ul style="list-style-type: none"> <li>hsa-miR-551b-3p</li> <li>hsa-miR-4288</li> <li>hsa-miR-1293</li> <li>hsa-miR-744-3p</li> <li>hsa-miR-101-5p</li> <li>hsa-miR-617</li> </ul>                                                                                                                                 |    |          |
| Amoebiasis (hsa05146)                                               | <ul style="list-style-type: none"> <li>hsa-miR-29a-3p</li> <li>hsa-miR-29c-3p</li> <li>hsa-miR-29b-3p</li> <li>hsa-miR-4288</li> <li>hsa-miR-1293</li> <li>hsa-miR-337-3p</li> <li>hsa-miR-146a-5p</li> </ul>                                                                                                      | 7  | 2.39E-05 |
| Signaling pathways regulating pluripotency of stem cells (hsa04550) | <ul style="list-style-type: none"> <li>hsa-miR-146a-5p</li> <li>hsa-miR-101-5p</li> <li>hsa-miR-29a-3p</li> <li>hsa-miR-29c-3p</li> <li>hsa-miR-29b-3p</li> <li>hsa-miR-337-3p</li> <li>hsa-miR-4288</li> <li>hsa-miR-219a-1-3p</li> <li>hsa-miR-369-5p</li> <li>hsa-miR-744-3p</li> <li>hsa-miR-192-5p</li> </ul> | 11 | 7.64E-05 |
| Glioma (hsa05214)                                                   | <ul style="list-style-type: none"> <li>hsa-miR-29a-3p</li> <li>hsa-miR-29c-3p</li> <li>hsa-miR-29b-3p</li> <li>hsa-miR-744-3p</li> <li>hsa-miR-219a-1-3p</li> <li>hsa-miR-337-3p</li> <li>hsa-miR-146a-5p</li> <li>hsa-miR-617</li> </ul>                                                                          | 8  | 2.62E-04 |
| Focal adhesion (hsa04510)                                           | <ul style="list-style-type: none"> <li>hsa-miR-29a-3p</li> <li>hsa-miR-29c-3p</li> <li>hsa-miR-29b-3p</li> <li>hsa-miR-1293</li> <li>hsa-miR-337-3p</li> <li>hsa-miR-744-3p</li> <li>hsa-miR-4288</li> <li>hsa-miR-219a-1-3p</li> <li>hsa-miR-192-5p</li> <li>hsa-miR-101-5p</li> <li>hsa-miR-146a-5p</li> </ul>   | 12 | 2.34E-03 |



|                                       |                                                                                                                                                                                                                    |    |          |
|---------------------------------------|--------------------------------------------------------------------------------------------------------------------------------------------------------------------------------------------------------------------|----|----------|
|                                       | hsa-miR-617                                                                                                                                                                                                        |    |          |
| FoxO signaling pathway (hsa04068)     | hsa-miR-4288<br>hsa-miR-101-5p<br>hsa-miR-617<br>hsa-miR-29a-3p<br>hsa-miR-29c-3p<br>hsa-miR-29b-3p<br>hsa-miR-1293<br>hsa-miR-337-3p<br>hsa-miR-219a-1-3p<br>hsa-miR-146a-5p<br>hsa-miR-744-3p<br>hsa-miR-3186-5p | 12 | 2.51E-03 |
| Thyroid hormone synthesis (hsa04918)  | hsa-miR-146a-5p<br>hsa-miR-192-5p<br>hsa-miR-29a-3p<br>hsa-miR-29c-3p<br>hsa-miR-29b-3p<br>hsa-miR-4288<br>hsa-miR-1293                                                                                            | 7  | 3.89E-03 |
| Colorectal cancer (hsa05210)          | hsa-miR-219a-1-3p<br>hsa-miR-29a-3p<br>hsa-miR-29c-3p<br>hsa-miR-29b-3p<br>hsa-miR-4288<br>hsa-miR-337-3p<br>hsa-miR-146a-5p<br>hsa-miR-192-5p<br>hsa-miR-744-3p<br>hsa-miR-617                                    | 10 | 7.77E-03 |
| Circadian rhythm (hsa04710)           | hsa-miR-617<br>hsa-miR-4288<br>hsa-miR-146a-5p<br>hsa-miR-337-3p<br>hsa-miR-29a-3p<br>hsa-miR-29c-3p<br>hsa-miR-29b-3p                                                                                             | 7  | 9.89E-03 |
| TGF-beta signaling pathway (hsa04350) | hsa-miR-4288<br>hsa-miR-744-3p<br>hsa-miR-337-3p<br>hsa-miR-617<br>hsa-miR-369-5p                                                                                                                                  | 10 | 9.89E-03 |

|                                       |                                                                                                                                                                                  |    |          |
|---------------------------------------|----------------------------------------------------------------------------------------------------------------------------------------------------------------------------------|----|----------|
|                                       | hsa-miR-1293<br>hsa-miR-219a-1-3p<br>hsa-miR-146a-5p<br>hsa-miR-29c-3p<br>hsa-miR-101-5p                                                                                         |    |          |
| Melanoma (hsa05218)                   | hsa-miR-337-3p<br>hsa-miR-29a-3p<br>hsa-miR-29c-3p<br>hsa-miR-29b-3p<br>hsa-miR-219a-1-3p<br>hsa-miR-744-3p<br>hsa-miR-4288<br>hsa-miR-146a-5p<br>hsa-miR-617                    | 9  | 1.30E-02 |
| Pancreatic cancer (hsa05212)          | hsa-miR-4288<br>hsa-miR-146a-5p<br>hsa-miR-617<br>hsa-miR-744-3p<br>hsa-miR-219a-1-3p<br>hsa-miR-337-3p<br>hsa-miR-29a-3p<br>hsa-miR-29c-3p<br>hsa-miR-29b-3p                    | 9  | 1.31E-02 |
| Estrogen signaling pathway (hsa04915) | hsa-miR-29a-3p<br>hsa-miR-192-5p<br>hsa-miR-29c-3p<br>hsa-miR-29b-3p<br>hsa-miR-4288<br>hsa-miR-744-3p<br>hsa-miR-337-3p<br>hsa-miR-146a-5p<br>hsa-miR-219a-1-3p<br>hsa-miR-1293 | 10 | 1.53E-02 |
| Acute myeloid leukemia (hsa05221)     | hsa-miR-744-3p<br>hsa-miR-337-3p<br>hsa-miR-146a-5p<br>hsa-miR-29a-3p<br>hsa-miR-29c-3p<br>hsa-miR-29b-3p<br>hsa-miR-4288<br>hsa-miR-1293<br>hsa-miR-617                         | 9  | 1.65E-02 |

|                                              |                                                                                                                                                                                                                                                                                                                 |    |          |
|----------------------------------------------|-----------------------------------------------------------------------------------------------------------------------------------------------------------------------------------------------------------------------------------------------------------------------------------------------------------------|----|----------|
| Neurotrophin signaling pathway (hsa04722)    | <ul style="list-style-type: none"> <li>hsa-miR-29a-3p</li> <li>hsa-miR-192-5p</li> <li>hsa-miR-29c-3p</li> <li>hsa-miR-29b-3p</li> <li>hsa-miR-337-3p</li> <li>hsa-miR-4288</li> <li>hsa-miR-744-3p</li> <li>hsa-miR-146a-5p</li> <li>hsa-miR-219a-1-3p</li> <li>hsa-miR-617</li> <li>hsa-miR-101-5p</li> </ul> | 11 | 1.98E-02 |
| Platelet activation (hsa04611)               | <ul style="list-style-type: none"> <li>hsa-miR-29a-3p</li> <li>hsa-miR-29c-3p</li> <li>hsa-miR-29b-3p</li> <li>hsa-miR-146a-5p</li> <li>hsa-miR-101-5p</li> <li>hsa-miR-337-3p</li> <li>hsa-miR-1293</li> <li>hsa-miR-219a-1-3p</li> <li>hsa-miR-4288</li> <li>hsa-miR-192-5p</li> </ul>                        | 10 | 2.51E-02 |
| Thyroid hormone signaling pathway (hsa04919) | <ul style="list-style-type: none"> <li>hsa-miR-29a-3p</li> <li>hsa-miR-29c-3p</li> <li>hsa-miR-29b-3p</li> <li>hsa-miR-4288</li> <li>hsa-miR-1293</li> <li>hsa-miR-337-3p</li> <li>hsa-miR-146a-5p</li> <li>hsa-miR-101-5p</li> <li>hsa-miR-192-5p</li> <li>hsa-miR-744-3p</li> </ul>                           | 10 | 2.51E-02 |
| ErbB signaling pathway (hsa04012)            | <ul style="list-style-type: none"> <li>hsa-miR-146a-5p</li> <li>hsa-miR-551b-3p</li> <li>hsa-miR-337-3p</li> <li>hsa-miR-1293</li> <li>hsa-miR-29a-3p</li> <li>hsa-miR-29c-3p</li> <li>hsa-miR-29b-3p</li> <li>hsa-miR-192-5p</li> <li>hsa-miR-744-3p</li> <li>hsa-miR-4288</li> <li>hsa-miR-617</li> </ul>     | 11 | 2.51E-02 |
| PI3K-Akt signaling                           | <ul style="list-style-type: none"> <li>hsa-miR-29a-3p</li> </ul>                                                                                                                                                                                                                                                | 12 | 2.51E-02 |

|                                       |                                                                                                                                                                                                                   |    |          |
|---------------------------------------|-------------------------------------------------------------------------------------------------------------------------------------------------------------------------------------------------------------------|----|----------|
| pathway (hsa04151)                    | hsa-miR-29c-3p<br>hsa-miR-29b-3p<br>hsa-miR-4288<br>hsa-miR-3186-5p<br>hsa-miR-1293<br>hsa-miR-337-3p<br>hsa-miR-192-5p<br>hsa-miR-744-3p<br>hsa-miR-146a-5p<br>hsa-miR-219a-1-3p<br>hsa-miR-598-3p               |    |          |
| Small cell lung cancer (hsa05222)     | hsa-miR-146a-5p<br>hsa-miR-29a-3p<br>hsa-miR-29c-3p<br>hsa-miR-29b-3p<br>hsa-miR-744-3p<br>hsa-miR-337-3p<br>hsa-miR-4288<br>hsa-miR-192-5p                                                                       | 8  | 3.87E-02 |
| Non-small cell lung cancer (hsa05223) | hsa-miR-337-3p<br>hsa-miR-29a-3p<br>hsa-miR-29c-3p<br>hsa-miR-29b-3p<br>hsa-miR-744-3p<br>hsa-miR-146a-5p<br>hsa-miR-617                                                                                          | 7  | 3.98E-02 |
| AMPK signaling pathway (hsa04152)     | hsa-miR-617<br>hsa-miR-29a-3p<br>hsa-miR-29c-3p<br>hsa-miR-29b-3p<br>hsa-miR-598-3p<br>hsa-miR-4288<br>hsa-miR-219a-1-3p<br>hsa-miR-744-3p<br>hsa-miR-192-5p<br>hsa-miR-3186-5p<br>hsa-miR-337-3p<br>hsa-miR-1293 | 12 | 4.99E-02 |

---

**Supplemental Table S5. Target gene of miR-29a-3p and miR-29c-3p in fibroblast growth factor receptor (FGFR) signaling pathway (GO0008543).**

| <b>Official Gene Symbol</b> | <b>Target genes of miR-29a-3p in the FGFR signaling pathway</b> | <b>Target genes of miR-29c-3p in the FGFR signaling pathway</b> |
|-----------------------------|-----------------------------------------------------------------|-----------------------------------------------------------------|
| PHLPP2                      | PHLPP2                                                          | PHLPP2                                                          |
| GSK3B                       | GSK3B                                                           | GSK3B                                                           |
| NDST1                       | NDST1                                                           | NDST1                                                           |
| NRAS                        | NRAS                                                            | NRAS                                                            |
| CALM3                       | CALM3                                                           | CALM3                                                           |
| AGO3                        | AGO3                                                            | AGO3                                                            |
| FRS2                        | FRS2                                                            | FRS2                                                            |
| RPS27A                      | RPS27A                                                          | RPS27A                                                          |
| UBC                         | UBC                                                             | UBC                                                             |
| TNRC6B                      | TNRC6B                                                          | TNRC6B                                                          |
| RICTOR                      | RICTOR                                                          | RICTOR                                                          |
| AGO1                        | AGO1                                                            |                                                                 |
| PDGFB                       | PDGFB                                                           |                                                                 |
| PIK3R1                      | PIK3R1                                                          | PIK3R1                                                          |
| SOS1                        | SOS1                                                            | SOS1                                                            |
| FOXO3                       | FOXO3                                                           | FOXO3                                                           |
| CDKN1A                      | CDKN1A                                                          | CDKN1A                                                          |
| ITPR3                       | ITPR3                                                           |                                                                 |
| TRIM71                      | TRIM71                                                          |                                                                 |
| PTEN                        | PTEN                                                            | PTEN                                                            |
| RAB14                       | RAB14                                                           |                                                                 |
| MDM2                        | MDM2                                                            | MDM2                                                            |
| PDGFA                       | PDGFA                                                           |                                                                 |
| TNRC6A                      |                                                                 | TNRC6A                                                          |
